# Supplementary material for: Highly stable chiral Cr(iii)-based metal–organic frameworks for enantioadsorption separation of aromatic alcohols
Source: Royal Society of Chemistry journal article supplement (doi:10.1039/d4qi00113c), 2024-01-01
Supplement: d4qi00113c1.pdf [file d4qi00113c1.pdf]

## ***Supporting Information***

### Highly stable chiral Cr(III)-based metal–organic frameworks for enantioadsorption separation of aromatic alcohols

Mengna Li<sup>a</sup>, Benlai Wu<sup>\*a</sup>, Maochun Hong<sup>\*b</sup>

<sup>a</sup>College of Chemistry, Zhengzhou University, Zhengzhou 450001, P. R. China

<sup>b</sup>State Key Laboratory of Structural Chemistry, Fujian Institute of the Research on the  
Structure of Matter, Chinese Academy of Sciences, Fuzhou, Fujian 350002, China

\*Corresponding authors: E-mail: [wbl@zzu.edu.cn](mailto:wbl@zzu.edu.cn); [hmc@fjirsm.ac.cn](mailto:hmc@fjirsm.ac.cn)

### **Table of Contents**

|                                           |         |
|-------------------------------------------|---------|
| 1. Experimental section.....              | S2–S11  |
| 2. General characterization.....          | S11–S22 |
| 3. HPLC results of enantioseparation..... | S22–S30 |

## **1. Experimental section**

### **1.1 Materials and general procedures**

All reagents and solvents used in synthetic studies were commercially available and used without further purification. The ligands L<sub>1</sub>, L<sub>2</sub> and L<sub>3</sub> were synthesized by routes in Schemes S1–S3. <sup>1</sup>H NMR and <sup>13</sup>C NMR spectra were recorded on a Bruker DPX-300 spectrometer. Thermogravimetric analyses (TGA) were measured using a STA 409 PC thermal analyzer with a heating rate of 10 °C min<sup>-1</sup> under air atmosphere. The powder X-ray diffraction (PXRD) patterns of the samples were measured on a RIGAKU-DMAX2500 X-ray diffractometer with Cu-K $\alpha$  radiation. Elemental analyses of C, H and N were measured on a Perkin-Elmer 240 elemental analyzer. Nitrogen adsorption experiments were performed on a Shimadzu ASAP2010. Solid-state and solution-state circular dichroism (CD) spectra were recorded on a MOS-450 spectrometer at room temperature. Optical absorption spectra were recorded on a T2602 Dual-Beam UV-Vis Spectrophotometer. X-ray photoelectron spectroscopy was carried out by THERMO SCIENTIFIC ESCALAB 250Xi. Scanning electron microscope (SEM) images and Energy Dispersive X-ray Spectroscopy (EDS) were carried out using JSM-7610FPlus and ULTIM MAX 40, respectively. High performance liquid chromatography (HPLC) was performed on a Shimadzu LC 20A with a specific chiral column and UV detector.

### **1.2. Ligand synthesis**

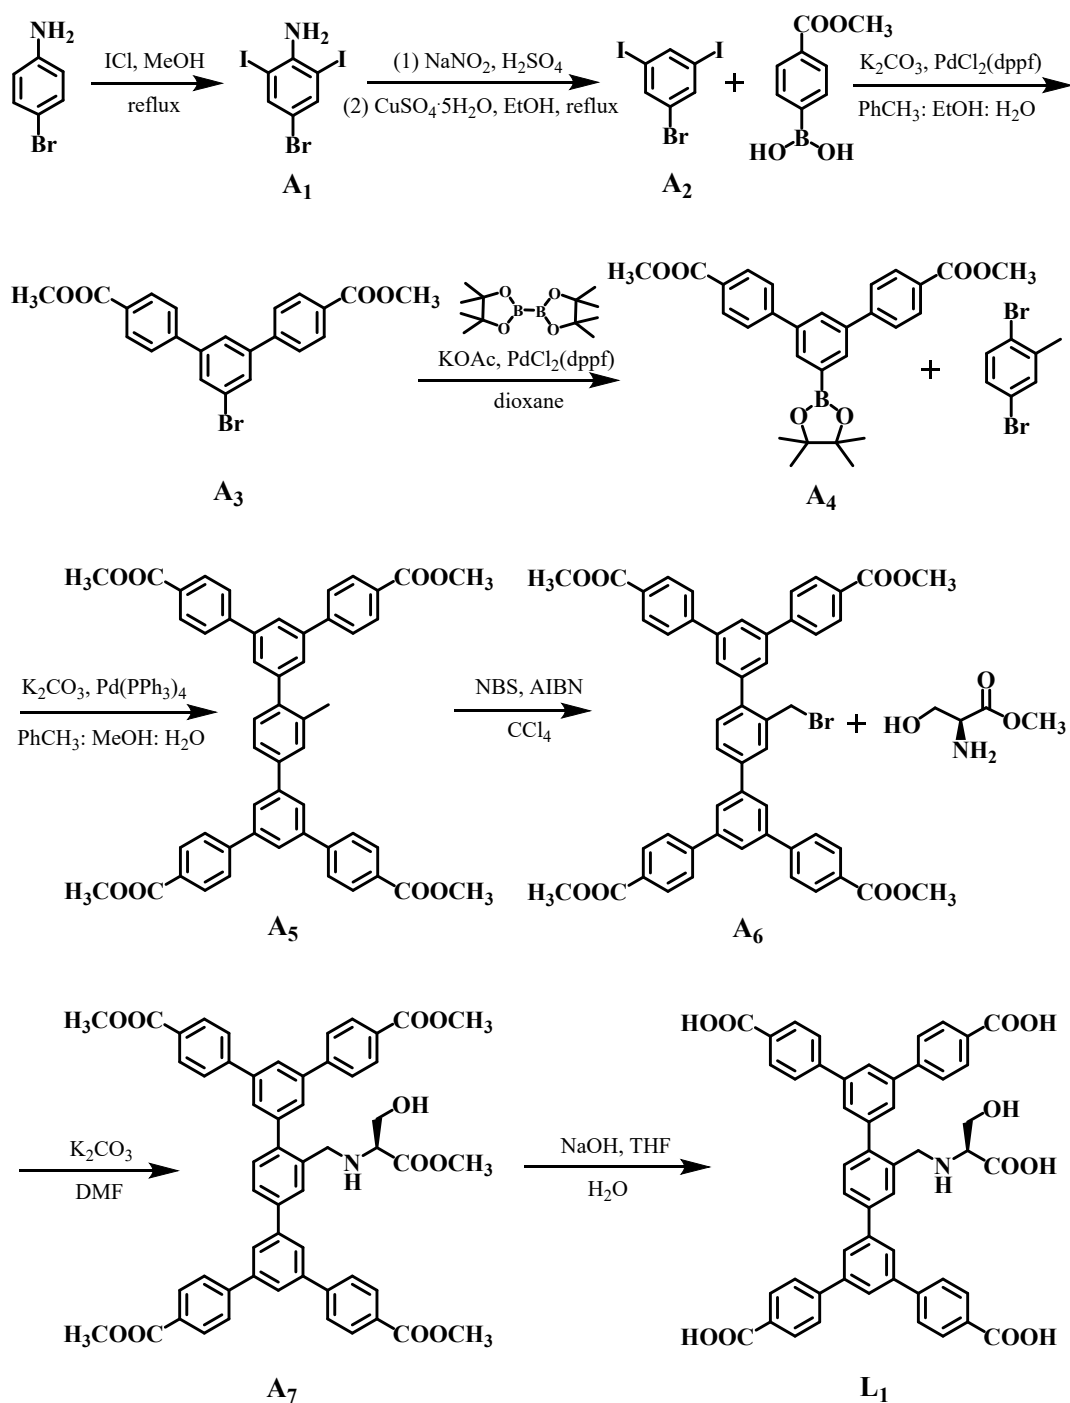

Scheme S1. Synthetic route of **L<sub>1</sub>**.

**Synthesis of compound A<sub>1</sub>.** 4-bromoaniline (246.44 mmol, 42.40 g) and ICl (616.10 mmol, 100 g) were refluxed in methanol solution (700 mL) at 78 °C for 36 h. After cooling to room temperature, a brown powder was filtered off, washed with methanol (3 × 30 mL), saturated Na<sub>2</sub>SO<sub>3</sub> solution (3 × 30 mL) and water, and dried to give a brown solid. Yield: 79.38 g (76%).

**Synthesis of compound A<sub>2</sub>.** Compound **A<sub>1</sub>** (18.05 g, 42.60 mmol), H<sub>2</sub>SO<sub>4</sub> (6 mL),

EtOH (300 mL), and NaNO<sub>2</sub> (7.32 g, 106.2 mmol), CuSO<sub>4</sub>·5H<sub>2</sub>O (1.05g, 4.26 mmol) were added to a 500 mL round-bottom flask. The reaction mixture was heated to reflux for 1.5 hours and then cooled to room temperature. The orange powders were filtered and washed with ethanol and water. Yield: 16.06 g (92 %).

**Synthesis of compound A<sub>3</sub>.** A 250 mL three round-bottom flask was charged with compound A<sub>2</sub> (2.1 mmol, 0.86 g) and 4-methoxycarbonylphenylboronic acid (4.62 mmol, 0.83 g) in a mixture solvent of PhCH<sub>3</sub>/EtOH/H<sub>2</sub>O (180 mL, V/V/V, 4/1/4). After stirring for 30 min under N<sub>2</sub>, K<sub>2</sub>CO<sub>3</sub> (10 mmol, 1.38 g) and PdCl<sub>2</sub>(dppf) (0.11 mmol, 80.19 mg) were added. The reaction mixture was heated at 60 °C for 5~6 h under N<sub>2</sub>. The mixture was extracted with CH<sub>2</sub>Cl<sub>2</sub> (3 × 100 mL). The combined organic layers were dried over Na<sub>2</sub>SO<sub>4</sub> and evaporated under reduced pressure. The crude product was purified by flash chromatography using dichloromethane/petroleum ether (V/V, 2:1) as eluent to obtain a white solid. Yield: 0.64 g (72 %).

**Synthesis of compound A<sub>4</sub>.** Compound A<sub>3</sub> (12 mmol, 5.10 g), Bis(pinacolato)diboron (19.89 mmol, 5.04 g) and KOAc (56.12 mmol, 5.5 g) were added to 1,4-dioxane (20 ml) at room temperature under N<sub>2</sub> for 30 min, PdCl<sub>2</sub>(dppf) (0.69 mmol, 503.1 mg) was added. The reaction mixture was heated at 80 °C for 12 h under N<sub>2</sub>. The mixture was extracted with CHCl<sub>3</sub> (3 × 100 mL). The combined organic extracts were dried over anhydrous Na<sub>2</sub>SO<sub>4</sub> and the solvent removed under reduced pressure. The crude product was purified by flash chromatography using dichloromethane/petroleum ether (V/V, 3/1) as eluent to obtain a white solid. Yield: 5.10 g (90 %).

**Synthesis of compound A<sub>5</sub>.** 2,5-dibromotoluene (8 mmol, 2 g), compound A<sub>4</sub> (18.4 mmol, 8.68 g) and K<sub>2</sub>CO<sub>3</sub> (80 mmol, 11.06 g) were added to a mixture solvent of PhCH<sub>3</sub>/MeOH/H<sub>2</sub>O (180 mL, V/V/V, 4/1/4) at room temperature under N<sub>2</sub> for 30 min, Pd(PPh<sub>3</sub>)<sub>4</sub> (0.56 mmol, 650 mg) was added. The mixture was extracted with CHCl<sub>3</sub> (3×100 mL). The organic layer was dried over anhydrous Na<sub>2</sub>SO<sub>4</sub> and evaporated, then the grey crude product was purified by flash chromatography using dichloromethane/petroleum ether (V/V, 2/1) as eluent to obtain a white solid. Yield: 4.31 g (69 %). <sup>1</sup>H NMR (600 MHz, CDCl<sub>3</sub>), δ (ppm): 8.17 (8 H, t, J = 8.7 Hz), 7.90 (2

H, s), 7.86 (2 H, d,  $J = 11.6$  Hz), 7.78 (8 H, dd,  $J = 13.6$  Hz), 7.67 (3 H, s), 7.63 (1 H, s), 7.48 (1 H, d,  $J = 7.7$  Hz), 3.96 (12 H, d,  $J = 4.4$  Hz), 2.48 (3 H, s).

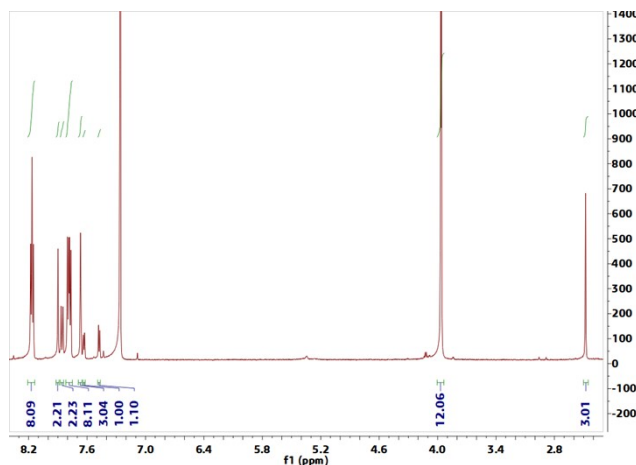

**Figure S1.** (a)  $^1\text{H}$  NMR analysis of compound  $\text{A}_5$ .

**Synthesis of compound  $\text{A}_6$ .** Compound  $\text{A}_5$  (6.92 mmol, 5.4 g), *N*-bromosuccinimide (12.92 mmol, 2.3 g) and 2,2'-azobis(2-methylpropionitrile) (AIBN) (1.17 mmol, 0.2 g) were added to a round bottom flask containing  $\text{CCl}_4$  (120 mL) and  $\text{CHCl}_3$  (40 mL). The flask was equipped with a water condenser and reflux at 80 °C under nitrogen atmosphere for 24 h. Yield: 5.66 g (95%).

**Synthesis of methyl *L*-serinate.** Under the condition of ice water bath, thionyl chloride (0.14 mol, 10 mL) was slowly added to 120 mL methanol solution for 6 h, and then *L*-serine (0.08 mol, 8.41 g) was added to the above solution, reacted at 60 °C for 8 h, cooled to room temperature and evaporated. The corresponding *L*-serine methyl ester hydrochloride was obtained. Then *L*-serine methyl ester hydrochloride was added to the mixed solution of dichloromethane (150 mL) and saturated  $\text{K}_2\text{CO}_3$  aqueous solution (150 mL). The organic phase was dried with anhydrous  $\text{Na}_2\text{SO}_4$  and evaporated to obtain a viscous yellowish liquid methyl *L*-serinate. Yield: 5.24 g (55%).

**Synthesis of compound  $\text{A}_7$ .** A mixture of methyl *L*-serinate (20 mmol, 2.38 g) and anhydrous  $\text{K}_2\text{CO}_3$  (20 mmol, 2.76 g) in DMF solution (35 mL) were stirring at room temperature for 24 h, and then compound  $\text{A}_6$  (5 mmol, 4.30 g) and  $\text{CHCl}_3$  (18 mL) were added to the mixed solution. The reaction mixture was heated at 50 °C for 72 h, and then slowly cooled to room temperature. The mixture was extracted with  $\text{CH}_2\text{Cl}_2$  ( $3 \times 100$  mL). The combined organic extracts evaporated under reduced pressure. The

crude product was purified by flash chromatography using dichloromethane/methyl alcohol (V/V, 100:1) as eluent to obtain white powder product. Yield: 2.29 g (51%).

**Synthesis of compound L<sub>1</sub>.** Compound A<sub>7</sub> (5 mmol, 4.49 g) was added to a mixed solution of NaOH aqueous solution (1.8 M, 70 mL) and THF (15 mL). The reaction mixture was heated at 67 °C for 18 h, and then the THF was removed under a vacuum. Adding dilute HCl to the remaining aqueous solution until the pH value of the solution attained 1~2. The resulted solid was collected by filtration, washed with water, and dried to give the final product as white powder. Yield: 3.97 g (96%). <sup>1</sup>H NMR (600 MHz, DMSO),  $\delta$  (ppm): 8.30 (1 H, s), 8.12 – 8.06 (16 H, m), 8.04 (5 H, d,  $J = 8.6$  Hz), 8.01 (2 H, d,  $J = 8.3$  Hz), 7.89 (2 H, d,  $J = 1.2$  Hz), 7.62 (1 H, d,  $J = 7.9$  Hz), 4.18 (2 H, dd,  $J = 45.8$  Hz), 3.73 – 3.64 (2 H, m), 3.34 (1 H, s). <sup>13</sup>C NMR (151 MHz, DMSO)  $\delta$  (ppm): 167.65, 144.45, 144.28, 141.80, 141.25, 140.53, 139.68, 130.62, 130.55, 130.41, 128.11, 128.11, 127.86, 125.83, 63.20, 61.64 – 61.58, 48.36 – 48.30, 40.63 – 39.48.

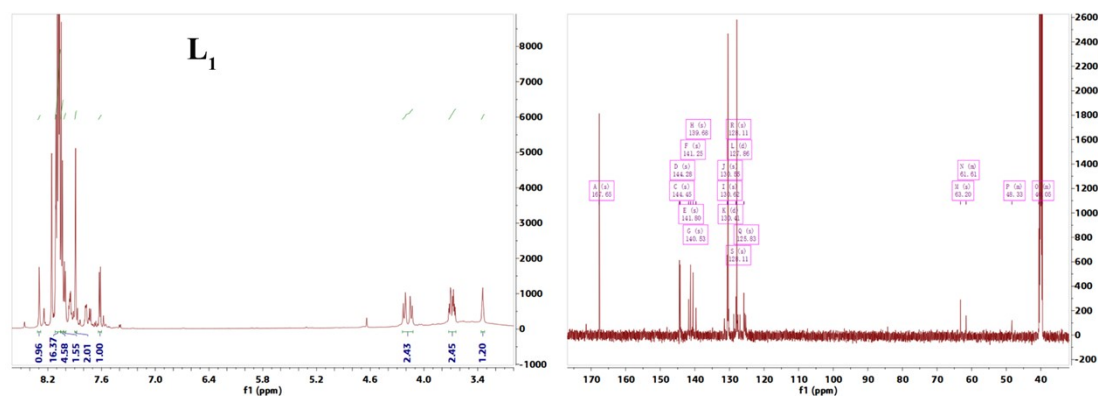

**Figure S2.** (a) <sup>1</sup>H NMR and (b) <sup>13</sup>C NMR analysis of ligand L<sub>1</sub>.

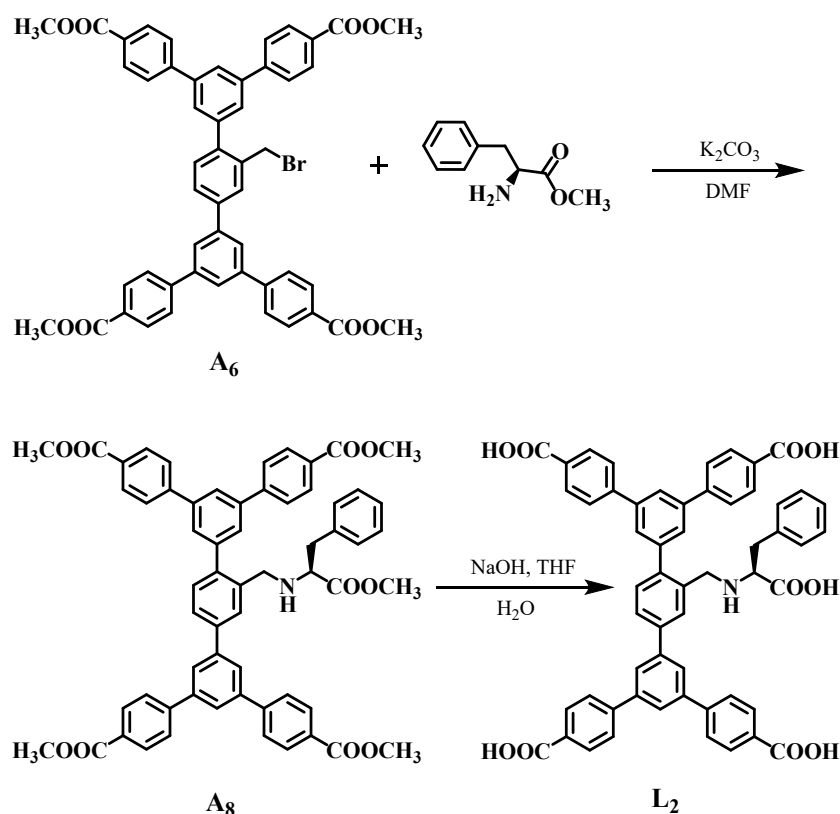

**Scheme S2.** Synthetic route of L<sub>2</sub>.

**Synthesis of methyl *L*-phenylalaninate.** Under the condition of ice water bath, thionyl chloride (0.14 mol, 10 mL) was slowly added to 150 mL methanol solution for 6 h, and then *L*-phenylalanine (0.08 mol, 13.2 g) was added to the above solution, reacted at 60 °C for 8 h, cooled to room temperature and evaporated. The corresponding methyl *L*-phenylalaninate hydrochloride was obtained. Then methyl *L*-phenylalaninate hydrochloride was added to the mixed solution of dichloromethane (150 mL) and saturated K<sub>2</sub>CO<sub>3</sub> aqueous solution (150 mL). The organic phase was dried with anhydrous Na<sub>2</sub>SO<sub>4</sub> and evaporated to obtain a viscous yellowish liquid methyl *L*-phenylalaninate. Yield: 8.75 g (61%).

**Synthesis of compound A<sub>8</sub>.** A mixture of methyl *L*-phenylalaninate (20 mmol, 3.58 g) and anhydrous K<sub>2</sub>CO<sub>3</sub> (20 mmol, 2.76 g) in DMF solution (35 mL) were stirring at room temperature for 24 h, and then compound A<sub>6</sub> (5 mmol, 4.30 g) and CHCl<sub>3</sub> (18 mL) were added to the mixed solution. The reaction mixture was heated at 50 °C for 72 h, and then slowly cooled to room temperature. The mixture was extracted with CH<sub>2</sub>Cl<sub>2</sub> (3 × 100 mL). The combined organic extracts evaporated under reduced pressure. The

crude product was purified by flash chromatography using dichloromethane/methyl alcohol (V/V, 100:1) as eluent to obtain white powder product. Yield: 2.78 g (58%).

**Synthesis of compound L<sub>2</sub>.** Compound A<sub>8</sub> (5 mmol, 4.79 g) was added to a mixed solution of NaOH aqueous solution (1.8 M, 70 mL) and THF (15 mL). The reaction mixture was heated at 67 °C for 18 h, and then the THF was removed under a vacuum. Adding dilute HCl to the remaining aqueous solution until the pH value of the solution attained 1~2. The resulted solid was collected by filtration, washed with water, and dried to give the final product as white powder. Yield: 4.26 g (96%). <sup>1</sup>H NMR (600 MHz, DMSO), δ (ppm): 8.12 – 8.07 (18 H, m), 8.03 (4 H, d, *J* = 8.5 Hz), 7.97 (1 H, d, *J* = 7.0 Hz), 7.87 (2 H, d, *J* = 1.4 Hz), 7.60 (1 H, d, *J* = 7.9 Hz), 7.09 (2 H, d, *J* = 7.4 Hz), 7.04 (2 H, t, *J* = 7.3 Hz), 6.99 (1 H, d, *J* = 6.8 Hz), 3.96 (2 H, d, *J* = 73.7 Hz), 2.95 (2 H, s), 2.54 – 2.52 (1 H, m). <sup>13</sup>C NMR (151 MHz, DMSO) δ (ppm): 167.59, 144.55, 144.39, 142.02 – 141.88, 141.21, 140.47, 139.56 – 139.53, 131.33 – 131.23, 130.46, 129.55, 128.34, 128.10 – 128.08, 127.88, 126.69 – 126.61, 125.87 – 125.80, 125.55 – 125.47, 40.72 – 39.28.

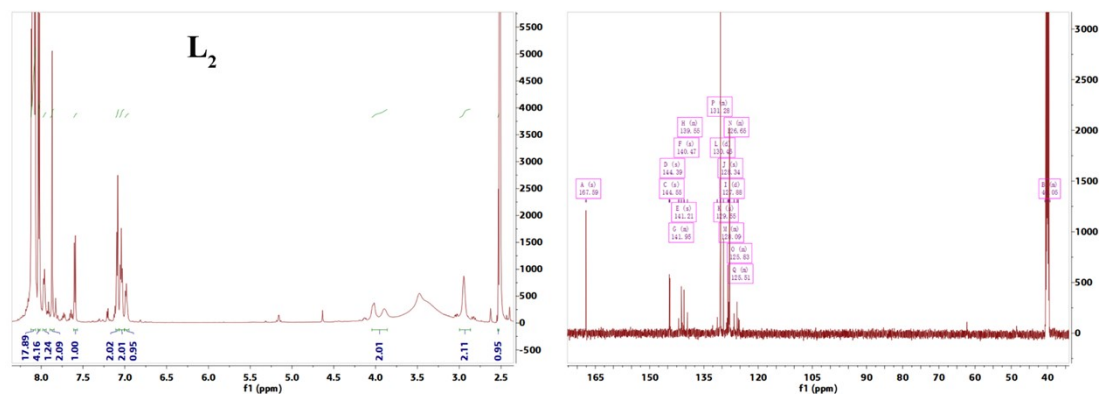

**Figure S3.** (a) <sup>1</sup>H NMR and (b) <sup>13</sup>C NMR analysis of ligand L<sub>2</sub>.



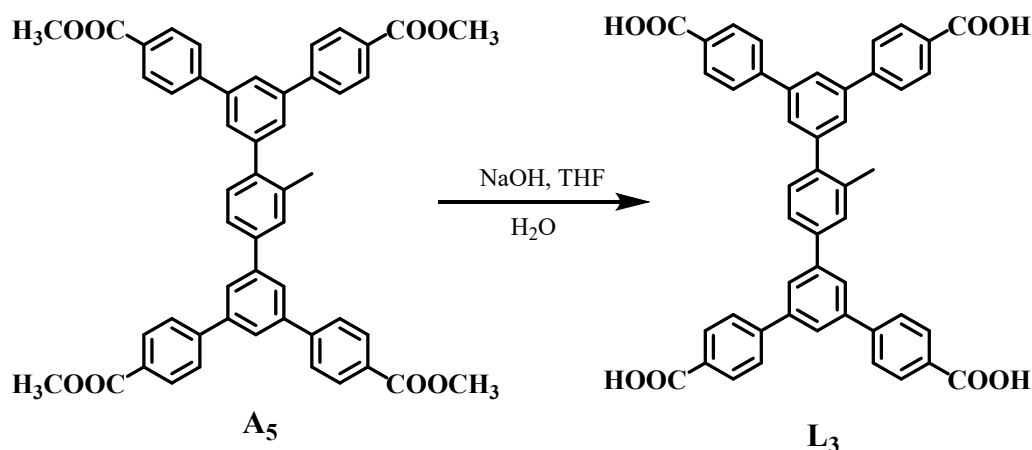

**Scheme S3.** Synthetic route of L<sub>3</sub>.

**Synthesis of compound L<sub>3</sub>.** Compound A<sub>5</sub> (2 mmol, 1.56 g) was added to a mixed solution of NaOH aqueous solution (1.8 M, 40 mL), CH<sub>3</sub>OH (20 mL) and THF (20 mL). The reaction mixture was heated at 78 °C for 18 h, and then the THF was removed under a vacuum. Adding dilute HCl to the remaining aqueous solution until the pH value of the solution attained 1~2. The resulted solid was collected by filtration, washed with water, and dried to give the final product as white powder. Yield: 1.42 g (98%).  
<sup>1</sup>H NMR (600 MHz, DMSO), δ (ppm): 13.05 (s, 4H), 8.08 (dd, *J* = 12.4, 6.4 Hz, 16H), 8.02 (d, *J* = 8.3 Hz, 4H), 7.95 (s, 1H), 7.86 (s, 1H), 7.81 (s, 2H), 7.56 (d, *J* = 7.9 Hz, 1H), 2.49 (s, 3H).  
<sup>13</sup>C NMR (151 MHz, DMSO) δ (ppm): 167.61, 167.58, 144.57, 144.41, 142.94, 142.02, 141.15, 140.76, 140.50, 139.51, 136.23, 130.44, 130.41, 130.34, 128.00, 127.89, 127.82, 125.78, 125.36, 20.92.

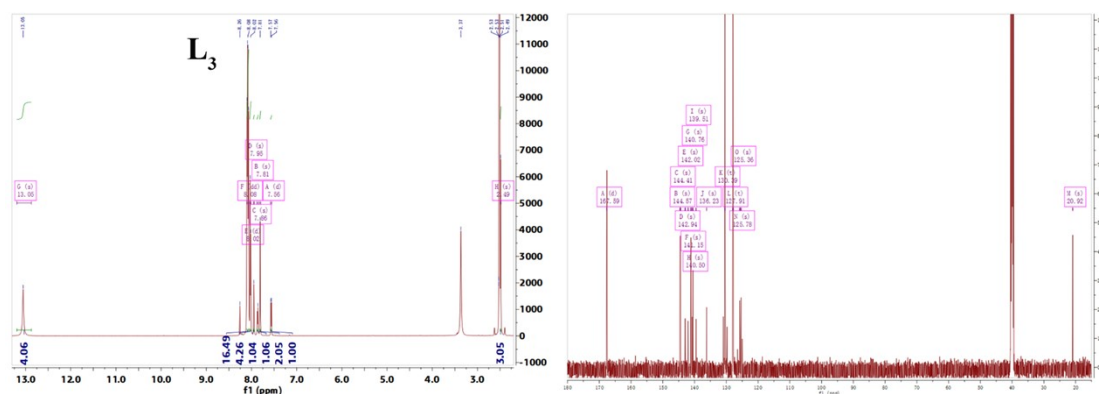

**Figure S4.** (a) <sup>1</sup>H NMR and (b) <sup>13</sup>C NMR analysis of ligand L<sub>3</sub>.

### 1.3. Fe-HMOFs synthesis

**Synthesis of Fe-HMOF-1:** L<sub>1</sub> (0.1 mmol, 83 mg), FeCl<sub>3</sub>·6H<sub>2</sub>O (0.3 mmol, 80

mg), acetic acid (1.1 mL) and ethanol (1 mL) were dissolved in 10 mL DMF. The mixture was heated in oven at 140 °C for 10 hours. The resulting brown-red microcrystalline powders were centrifuged and washed with fresh DMF and acetone several times and finally stored in fresh acetone.

**Synthesis of Fe-HMOF-2:** L<sub>2</sub> (0.1 mmol, 89 mg), FeCl<sub>3</sub>·6H<sub>2</sub>O (0.3 mmol, 80 mg), acetic acid (1.3 mL) and ethanol (1 mL) were dissolved in 10 mL DMF. The mixture was heated in oven at 140 °C for 10 hours. The resulting brown-red microcrystalline powders were centrifuged and washed with fresh DMF and acetone several times and finally stored in fresh acetone.

**Synthesis of Fe-MOF-CH<sub>3</sub>:** L<sub>3</sub> (0.05 mmol, 36.25 mg), FeCl<sub>3</sub>·6H<sub>2</sub>O (0.15 mmol, 40 mg), acetic acid (0.55 mL) and ethanol (0.5 mL) were dissolved in 6 mL DMF. The mixture was heated in oven at 140 °C for 10 hours. The resulting brown-red microcrystalline powders were centrifuged and washed with fresh DMF and acetone several times and finally stored in fresh acetone.

#### 1.4. Cr-HMOFs synthesis

**Synthesis of Cr-HMOF-1, Cr-HMOF-2 and Cr-MOF-CH<sub>3</sub>:** 50 mg, 100 mg, 200 mg and 400 mg CrCl<sub>3</sub>·6H<sub>2</sub>O were separately dissolved in 100 mL acetone to form a series of Cr<sup>3+</sup> stock solutions with different concentrations (0.5 mg/mL, 1 mg/mL, 2 mg/mL, 4 mg/mL), respectively. Freshly prepared **Fe-HMOF-1**, **Fe-HMOF-2** and **Fe-MOF-CH<sub>3</sub>** (about 800 mg) stored in acetone were separately soaked in each of the above stock solutions (20 mL) for about 2~3 hours at 80 °C. Notably, the replacement of the stock solution is carried out in ascending order of concentration, and the process is repeated several times until Fe-HMOFs turn dark green. After exchange, the resulting dark green powders were separately dispersed in 9 mL DMF and heated at 80 °C for about 48 hours, during which the DMF solution was changed 6 times. After that, these samples were further dispersed in 0.25 M hydrochloric acid aqueous solution for about 10 hours at 50 °C, and washed with water 3 times. And then, the solvent was exchanged sequentially with fresh THF (6 × 9 mL) and acetone (6 × 9 mL) at room temperature for four days. These solvent-exchanged samples **Cr-HMOF-1**, **Cr-HMOF-2** and **Cr-MOF-CH<sub>3</sub>** were then activated at 100 °C for 12 h under dynamic vacuum.

### 1.5. Experimental procedure for enantioadsorption separation in solution.

The activated samples **Cr-HMOF-1** or **Cr-HMOF-2** (200 mg) were separately soaked in 100 mL ethanol solutions of racemic 1-phenylethanol, 1-phenyl-1-propanol, 1-phenylbutan-1-ol and 1-phenyl-2-propanol (250 ppm) for adsorption with a stirring speed of 350 rpm at room temperature. After 30 minutes of adsorption, the soaked samples were filtered and washed 6 times with fresh anhydrous ethanol solution to remove the residual guest molecules on the outer surface of the sample particles. Then the samples were immersed in 9 mL fresh anhydrous ethanol solution at room temperature, and soaked 6 times within 2 days to extract the encapsulated guest molecules inside the pores. Finally, the ethanol solutions containing the extracted chiral compounds were collected together and concentrated to 0.3 mL for further detection of *ee* values by HPLC analysis. The solid adsorbents **Cr-HMOF-1** and **Cr-HMOF-2** could be reactivated by immersing them in hydrochloric acid methanol solution (0.30 M), tetrahydrofuran and acetone solutions for 2 days, respectively. Afterwards, they were dried under vacuum at 100 °C and reused for continuous separation.

## 2. General characterization

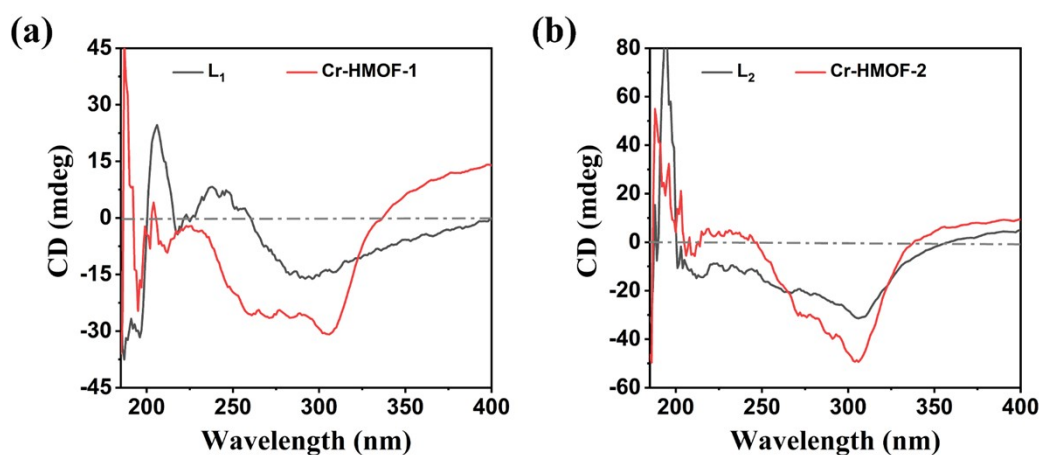

**Figure S5.** Solid-state CD spectra of free ligands L<sub>1</sub> and L<sub>2</sub>, and **Cr-HMOF-1** and **Cr-HMOF-2**.

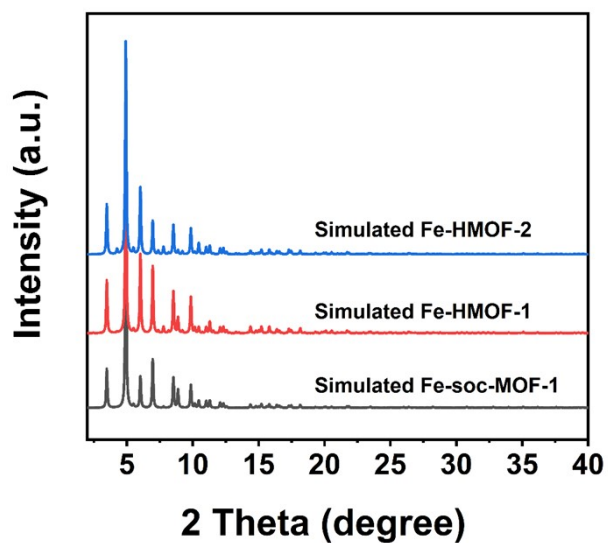

Figure S6. PXRD patterns of simulated Fe-HMOF-1 and Fe-HMOF-2 and Fe-soc-MOF-1.

## 2.1 Crystal structure analysis

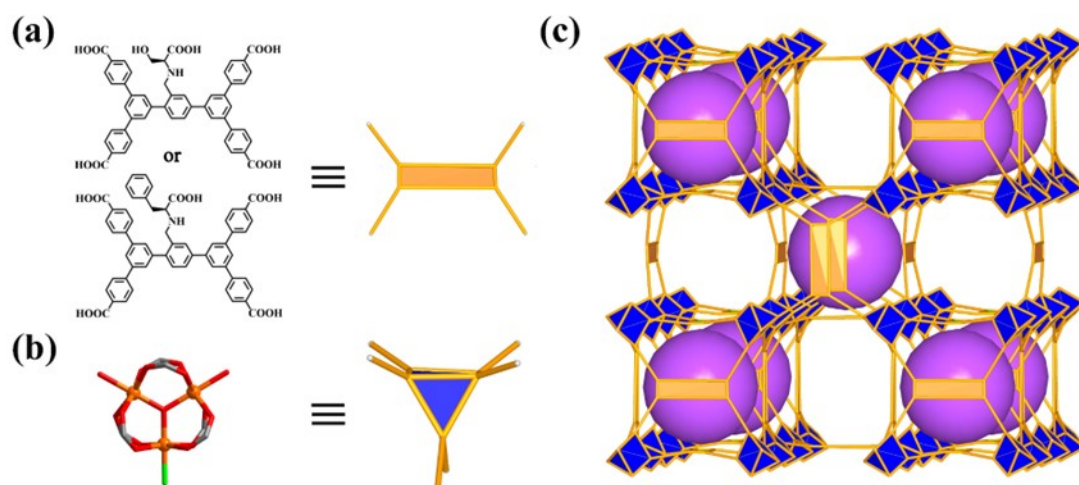

Figure S7. (a)  $L_1$  or  $L_2$  and simplified 4-connected node; (b)  $Fe_3(\mu_3-O)(H_2O)_2Cl(COO^-)_6$  SBU and simplified 6-connected node; (c) the augmented *soc* net.

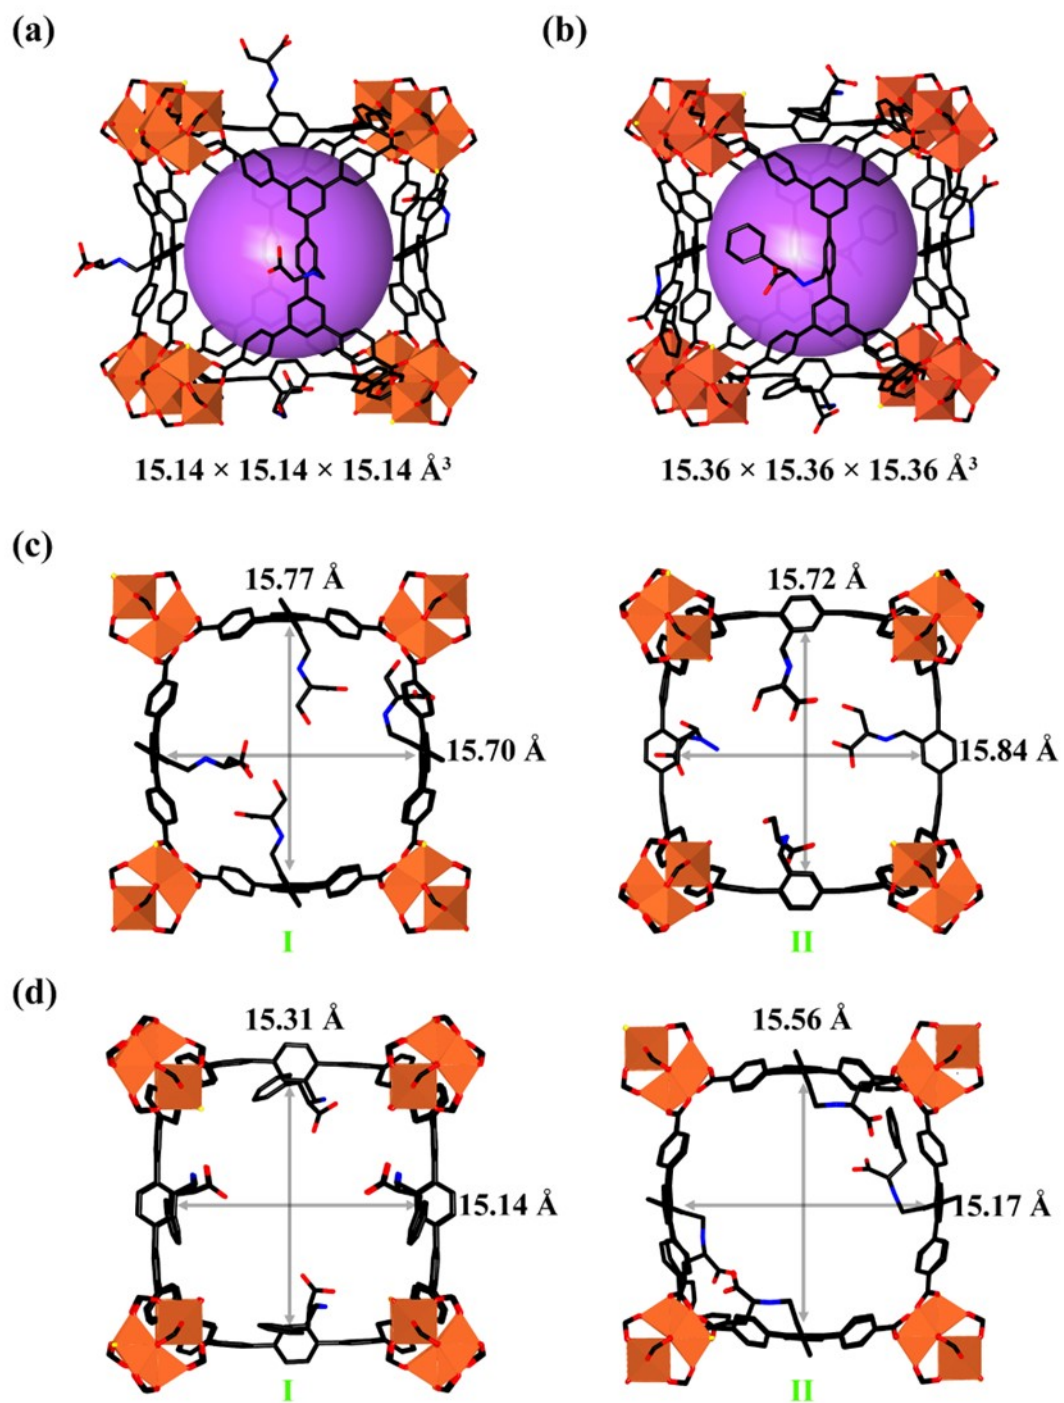

**Figure S8.** The sizes of (a and b) cubic cages and (c and d) two types of 1D channels in Fe-HMOF-1 and Fe-HMOF-2.

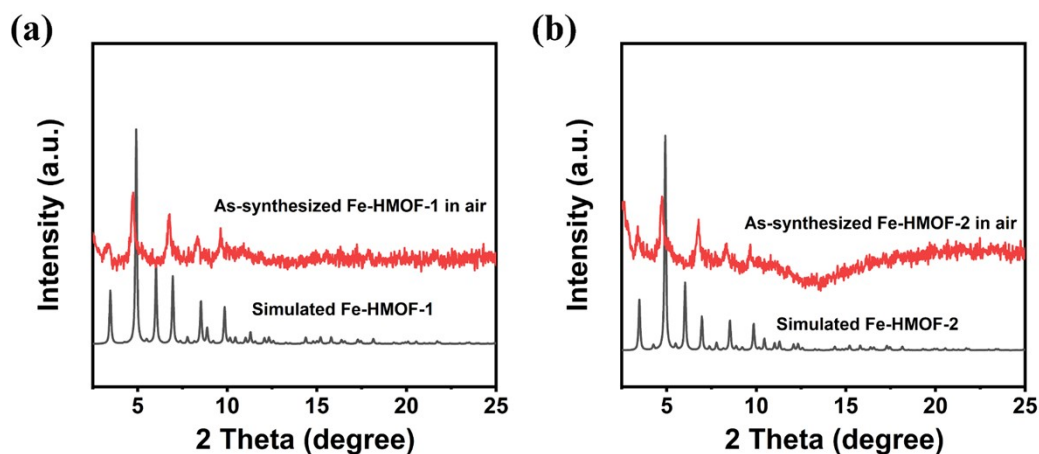

**Figure S9.** Comparison of PXRD patterns of simulated **Fe-HMOF-1** and **Fe-HMOF-2** and as-synthesized **Fe-HMOF-1** and **Fe-HMOF-2**.

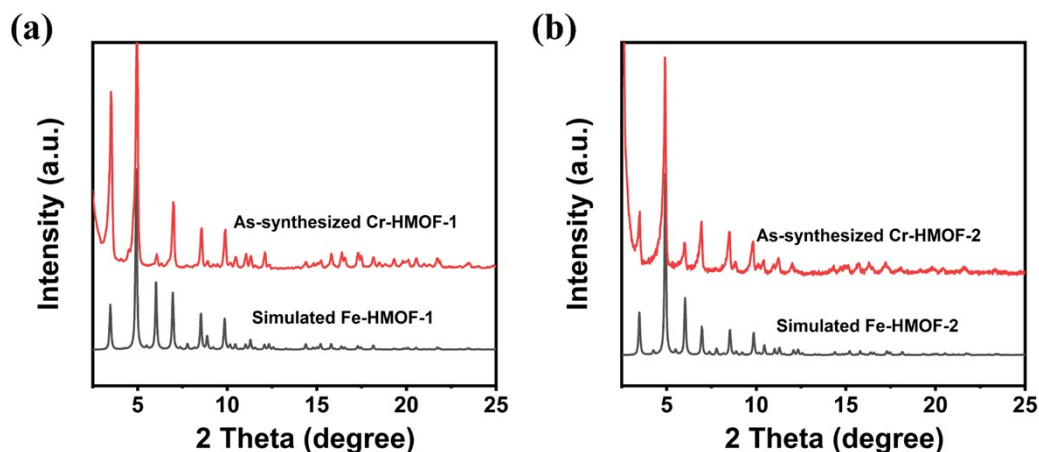

**Figure S10.** Comparison of PXRD patterns of simulated **Fe-HMOF-1** and **Fe-HMOF-2**, and as-synthesized **Cr-HMOF-1** and **Cr-HMOF-2**.

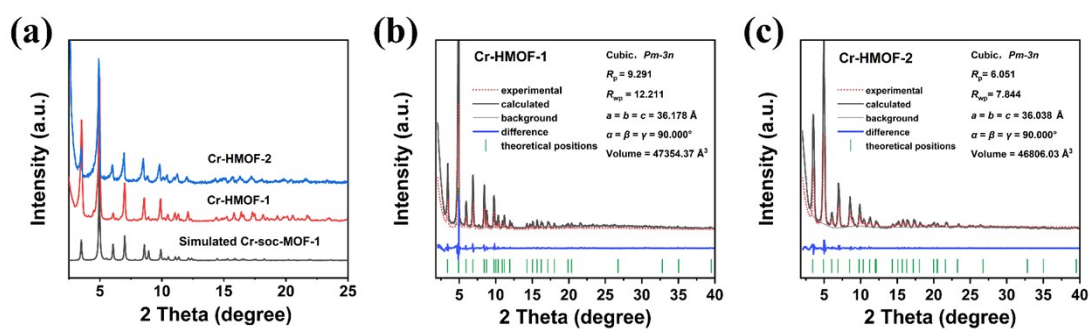

**Figure S11.** (a) Comparison of PXRD patterns of as-synthesized **Cr-HMOF-1**, **Cr-HMOF-2** and simulated **Cr-soc-MOF-1**; (b and c) Rietveld refinement results based on the experimental PXRD

data

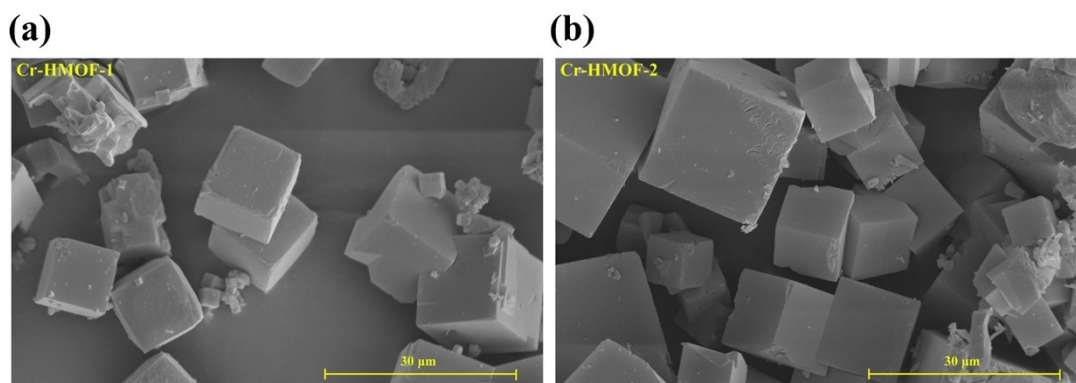

Figure S12. (a) SEM images of Cr-HMOF-1 and Cr-HMOF-2.

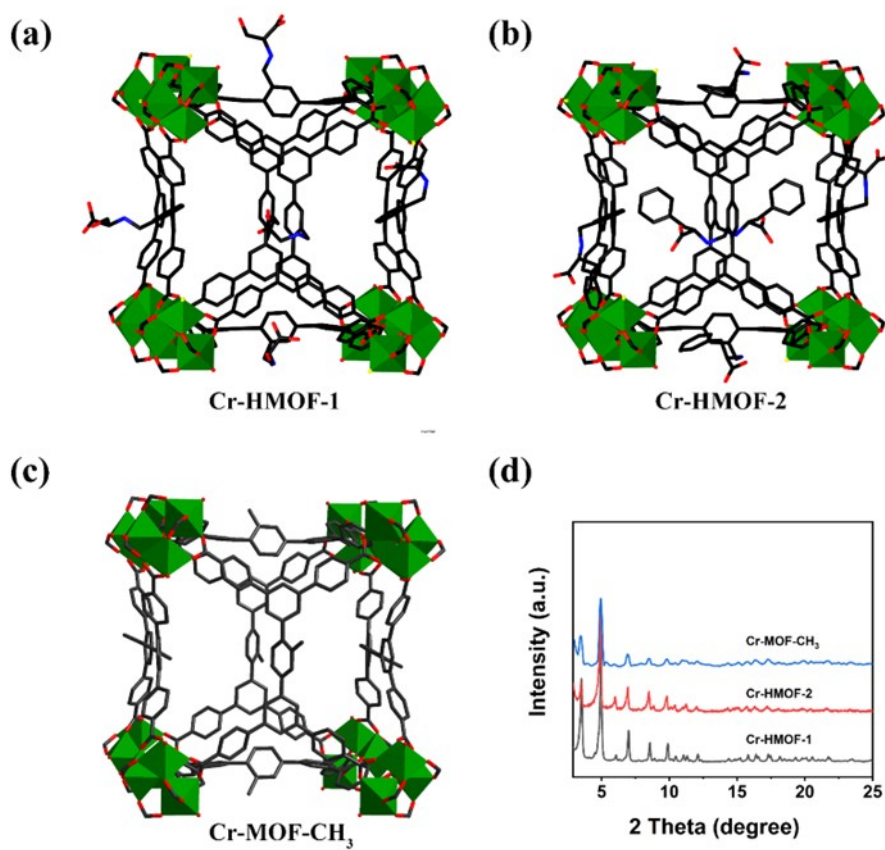

Figure S13. (a–c) Cubic cage structures and (d) PXRD patterns of Cr-HMOF-1 and Cr-HMOF-2 and Cr-MOF-CH<sub>3</sub>.

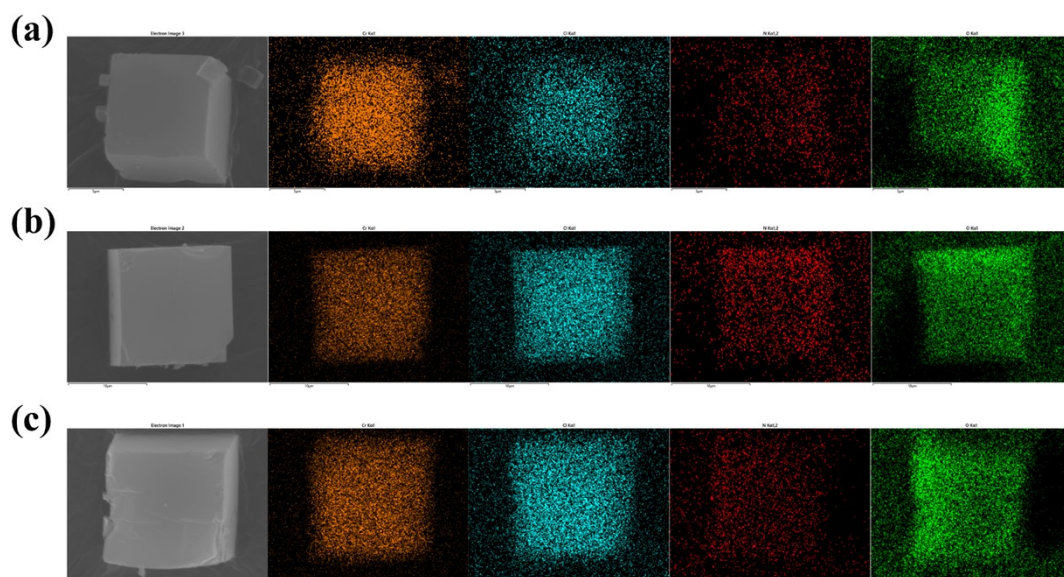

**Figure S14.** Energy-dispersive X-ray spectroscopy elemental mapping analysis of (a) **Cr-MOF-CH<sub>3</sub>**, (b) **Cr-HMOF-1** and (c) **Cr-HMOF-2** (Cr, orange; Cl, blue; N, red; O, green).

**Table S1** Elemental analysis

|                                 | Experimental Value |       |       | Theoretical Value |       |       |
|---------------------------------|--------------------|-------|-------|-------------------|-------|-------|
|                                 | C (%)              | N (%) | H (%) | C (%)             | N (%) | H (%) |
| <b>Decomposed L<sub>1</sub></b> | 71.93              | 1.27  | 4.52  | 72.54             | 1.69  | 4.51  |
| <b>Decomposed L<sub>2</sub></b> | 72.40              | 1.05  | 4.51  | 75.75             | 1.58  | 4.65  |
| <b>Fe-HMOF-1</b>                | 61.34              | 1.54  | 3.87  | 60.13             | 1.40  | 3.57  |
| <b>Fe-HMOF-2</b>                | 62.00              | 1.15  | 3.71  | 63.52             | 1.32  | 3.84  |
| <b>Cr-HMOF-1</b>                | 60.06              | 1.00  | 4.06  | 60.60             | 1.41  | 3.60  |
| <b>Cr-HMOF-2</b>                | 59.35              | 1.19  | 4.32  | 63.99             | 1.33  | 3.87  |

**Table S2** ICP-MS results of metal metathesis synthesized **Cr-HMOF-1** and **Cr-HMOF-2**

| Sample           | Metal 1          | C <sub>o</sub> (mg L <sup>-1</sup> ) | Metal 2          | C <sub>o</sub> (mg L <sup>-1</sup> ) | Molar percentage (Cr <sup>3+</sup> ) |
|------------------|------------------|--------------------------------------|------------------|--------------------------------------|--------------------------------------|
| <b>Cr-HMOF-1</b> | Cr <sup>3+</sup> | 6.860                                | Fe <sup>3+</sup> | 0.236                                | 96.90 %                              |
| <b>Cr-HMOF-2</b> | Cr <sup>3+</sup> | 8.435                                | Fe <sup>3+</sup> | 0.055                                | 99.35 %                              |

**Table S3** ICP-MS results of supernatant of **Cr-HMOF-1** and **Cr-HMOF-2** treated under different



conditions

| Sample                              | Sample Mass<br>(mg) | Volume of<br>supernatant (mL) | Concentration of<br>Cr <sup>3+</sup> (mg L <sup>-1</sup> ) | Leaching<br>ratio (%) |
|-------------------------------------|---------------------|-------------------------------|------------------------------------------------------------|-----------------------|
| 1 M HCl treated<br><b>Cr-HMOF-1</b> | 60                  | 10                            | 0.406                                                      | 0.193                 |
| 3 M HCl treated<br><b>Cr-HMOF-1</b> | 60                  | 10                            | 0.444                                                      | 0.211                 |
| pH = 12 treated<br><b>Cr-HMOF-1</b> | 60                  | 10                            | 0.118                                                      | 0.056                 |
| 1 M HCl treated<br><b>Cr-HMOF-2</b> | 60                  | 10                            | 0.086                                                      | 0.041                 |
| 3 M HCl treated<br><b>Cr-HMOF-2</b> | 60                  | 10                            | 0.291                                                      | 0.139                 |
| pH = 12 treated<br><b>Cr-HMOF-2</b> | 60                  | 10                            | 0.027                                                      | 0.013                 |

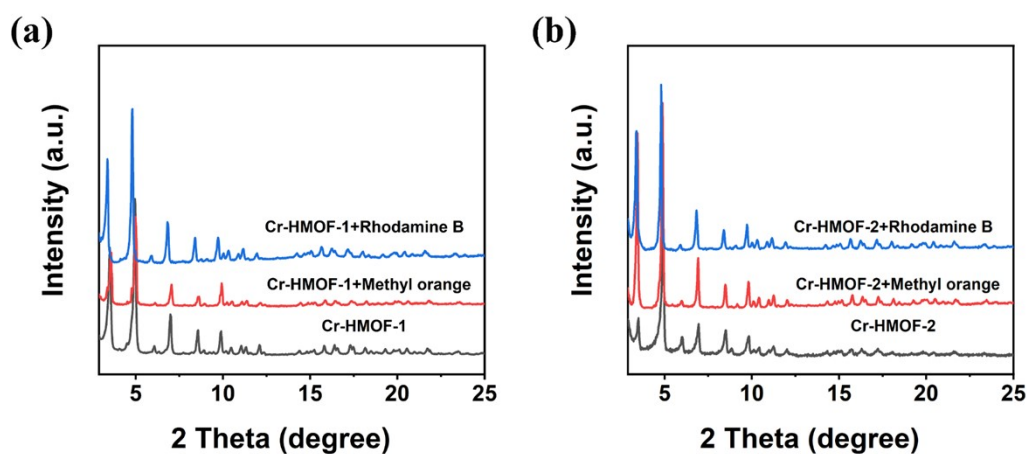

**Figure S15.** Comparison of PXRD patterns of **Cr-HMOF-1** and **Cr-HMOF-2** before and after dye adsorption.

### Dye uptake experiments

The activated **Cr-HMOF-1** (5 mg) or **Cr-HMOF-2** (5 mg) were soaked in a

saturated solution of methyl orange or rhodamine B in ethanol for 24 h, respectively. To remove the dye adsorbed on the surface of crystals, the resulting crystals were washed with ethanol until the solution became colorless. Then the samples were sonicated and soaked with ethanol and the resulting solution was diluted to 250 mL. The amounts of dyes were determined by comparing the UV absorptions with the standard curves.

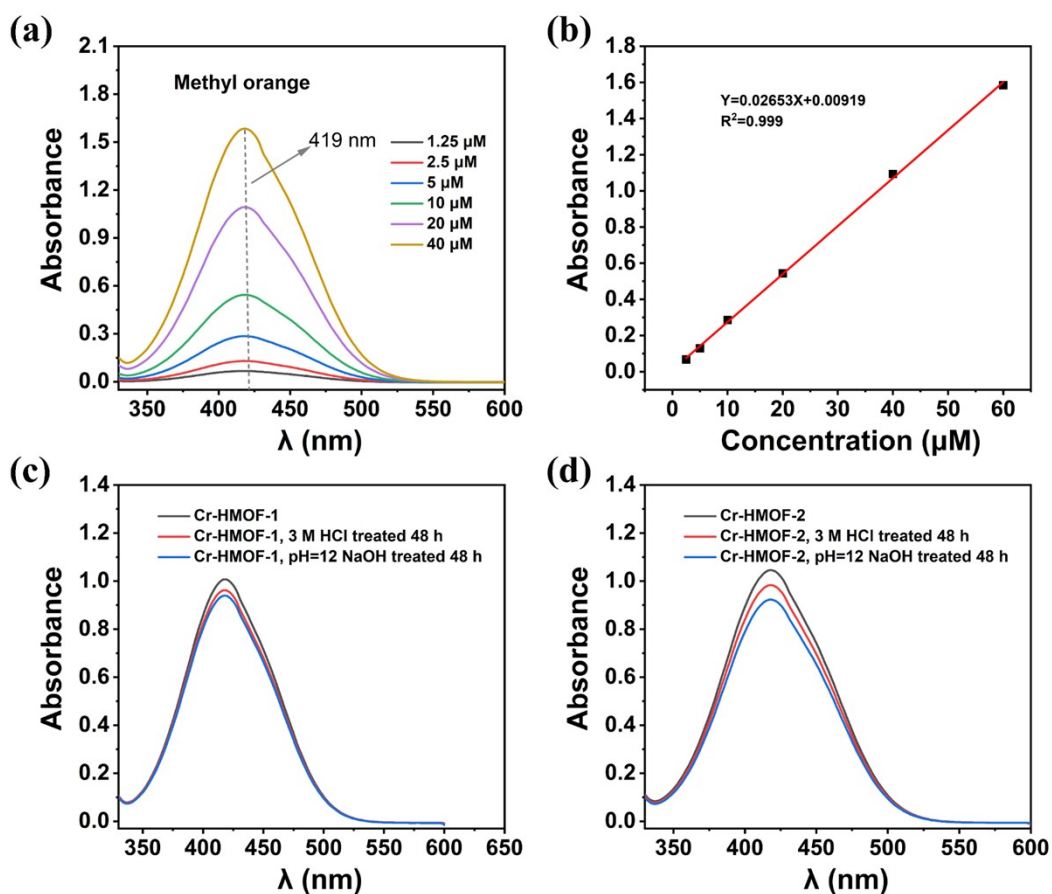

**Figure S16.** (a) UV-Vis absorption spectra of methyl orange with different concentrations; (b) the standard curves; (c and d) adsorption capacity of methyl orange by **Cr-HMOF-1** and **Cr-HMOF-2** treated under different conditions (selected wavelength = 419 nm, concentration range from 1.25 to 40 μM).

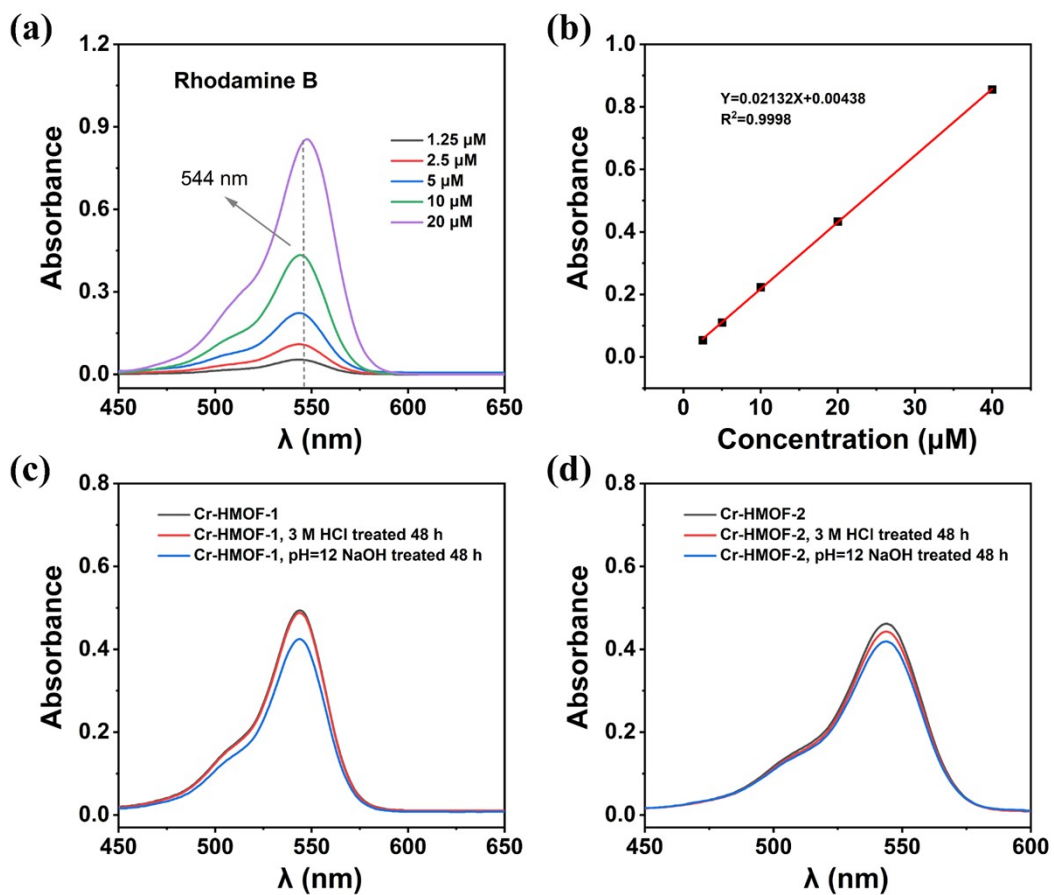

**Figure S17.** (a) UV-Vis absorption spectra of rhodamine B with different concentrations; (b) the standard curves; (c and d) adsorption capacity of rhodamine B by Cr-HMOF-1 and Cr-HMOF-2 treated under different conditions (selected wavelength = 544 nm, concentration range from 1.25 to 20  $\mu\text{M}$ ).

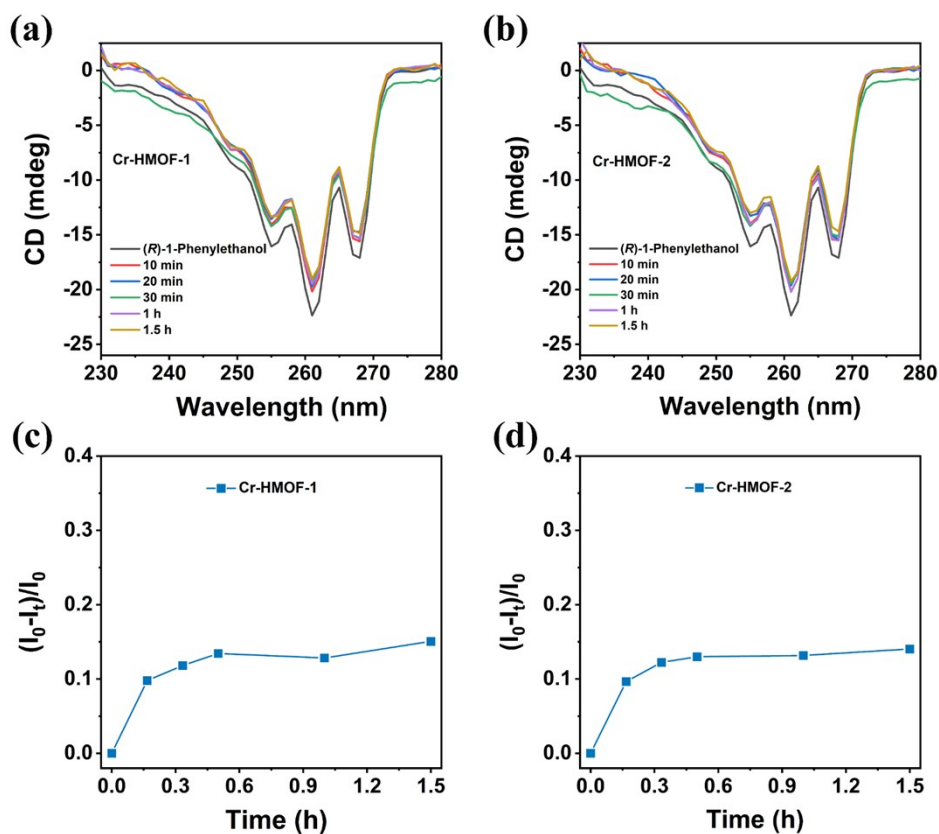

**Figure S18.** (a and b) CD spectra of *R*-1-phenylethanol ethanol solution after adsorbed by materials Cr-HMOF-1 or Cr-HMOF-2 at different contact time; (c and d) the adsorption efficiency  $[(I_0 - I_t)/I_0]$  was calculated from the changes of CD signals at the maximum wavelength. [ $V = 25$  mL,  $m$  (adsorbent) = 50 mg, temperature = 25 °C, initial concentration (adsorbate) =  $4 \times 10^{-3}$  M]

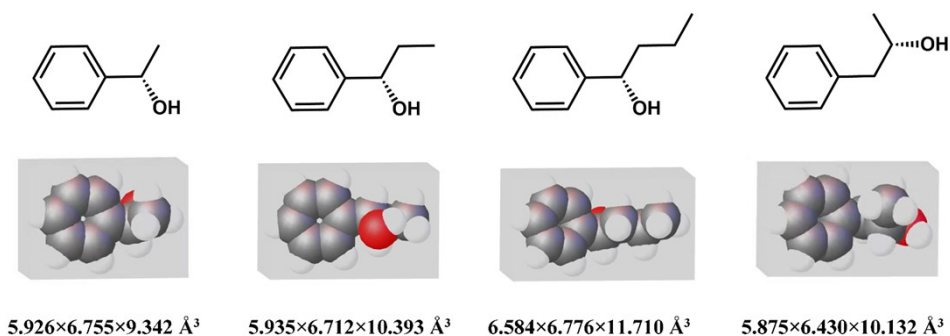

**Figure S19.** Molecular dimensions of 1-phenylethanol, 1-phenyl-1-propanol, 1-phenylbutan-1-ol and 1-phenyl-2-propanol

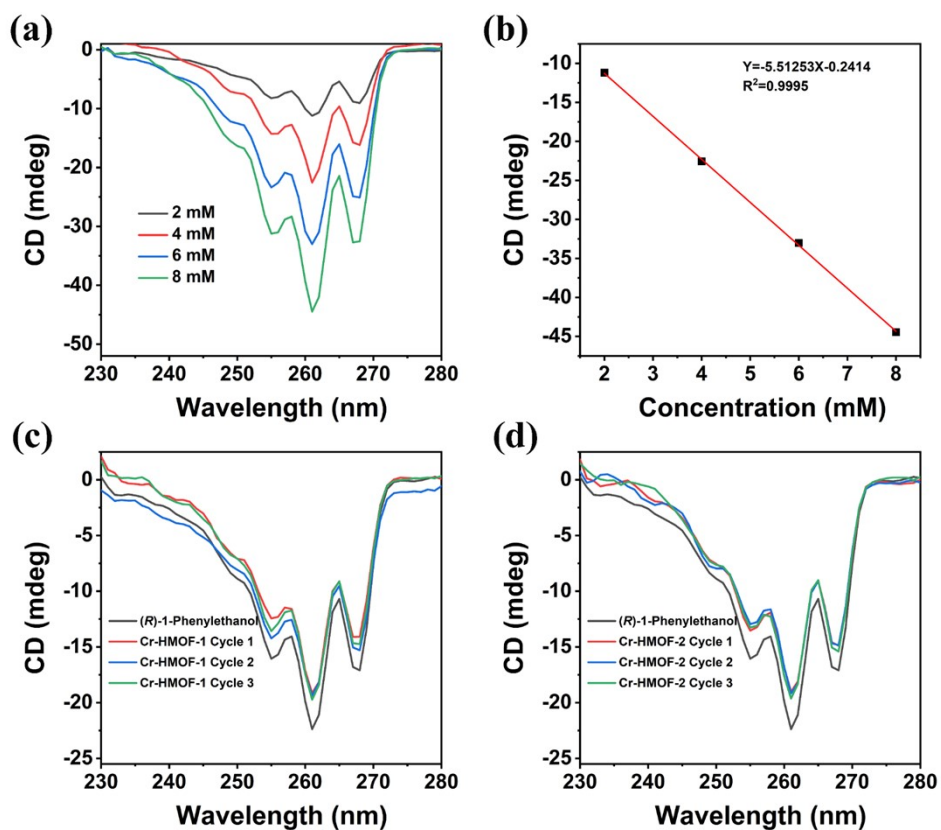

**Figure S20.** (a) CD spectra of (*R*)-1-phenylethanol ethanol solution with different concentrations; (b) the standard curves; (c and d) CD spectra of (*R*)-1-phenylethanol adsorbed by materials **Cr-HMOF-1** and **Cr-HMOF-2** in three cycles [ $V = 25$  mL,  $m$  (adsorbent) = 50 mg, temperature = 25 °C, initial concentration (adsorbate) =  $4 \times 10^{-3}$  M,  $t = 2$  h].

**Table S4** Recyclable  $Q_e$  and  $ee$  values on **Cr-HMOF-1** and **Cr-HMOF-2** for 1-phenylethanol

|                             | <b>Cr-HMOF-1</b> |         |         | <b>Cr-HMOF-2</b> |         |         |
|-----------------------------|------------------|---------|---------|------------------|---------|---------|
|                             | Cycle 1          | Cycle 2 | Cycle 3 | Cycle 1          | Cycle 2 | Cycle 3 |
| $Q_e$ (mg g <sup>-1</sup> ) | 28.65            | 26.65   | 23.44   | 29.7             | 28.43   | 24.29   |
| $ee$ (%)                    | 86.8             | 85.8    | 80.8    | 98.6             | 95.2    | 94.6    |

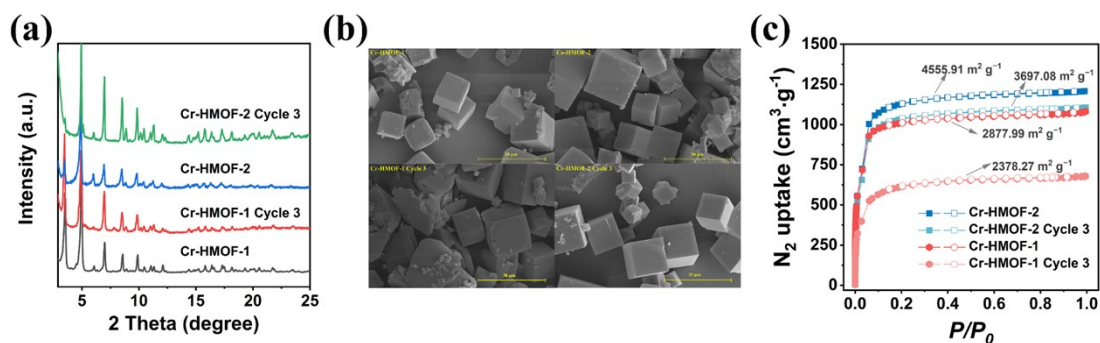

**Figure S21.** (a) PXRD patterns, (b) SEM images and (c) N<sub>2</sub> adsorption and desorption isotherms of Cr-HMOF-1 and Cr-HMOF-2 after three cycles.

### 3. HPLC results of enantioseparation

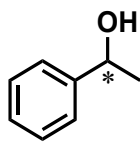

Chiral HPLC analysis: IG column; n-hexane/ethanol = 95/5 (v/v); flow rate = 0.3 mL min<sup>-1</sup>; 254 nm; 35 °C;  $t_R = 26.400$  min,  $t_S = 28.280$  min.

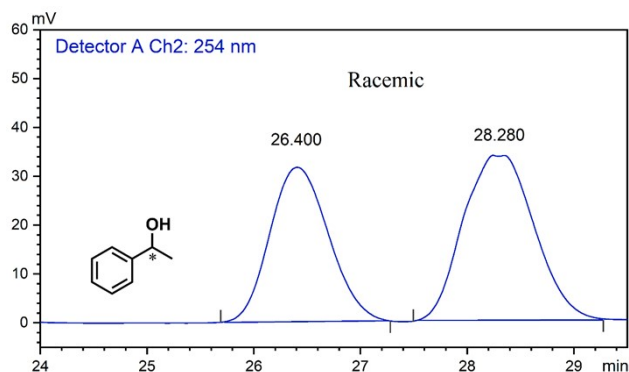

| Serial Number | Type                         | Retention Time | Peak Area | Area % |
|---------------|------------------------------|----------------|-----------|--------|
| 1             | ( <i>R</i> )-1-phenylethanol | 26.400         | 68003.91  | 43.7   |
| 2             | ( <i>S</i> )-1-phenylethanol | 28.280         | 87487.53  | 56.3   |
| The Toal      |                              |                | 155491.44 |        |

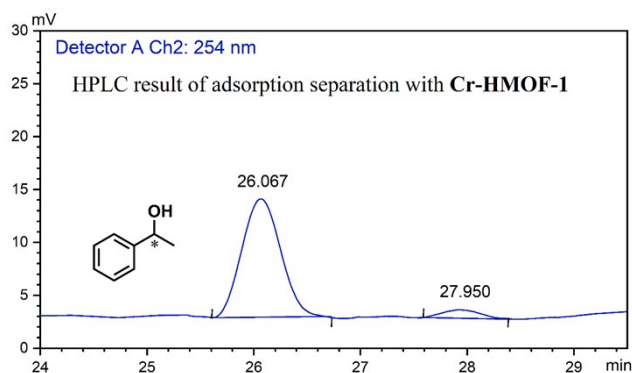

| Serial Number | Type                         | Retention Time | Peak Area | Area % |
|---------------|------------------------------|----------------|-----------|--------|
| 1             | ( <i>R</i> )-1-phenylethanol | 26.067         | 18599.904 | 93.4   |
| 2             | ( <i>S</i> )-1-phenylethanol | 27.950         | 1312.913  | 6.6    |
| The Toal      |                              |                | 19912.817 |        |

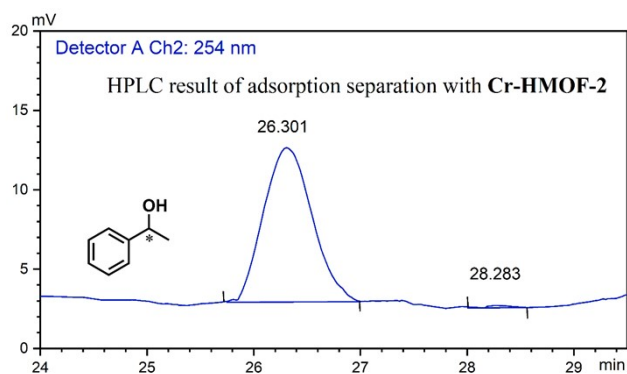

| Serial Number | Type                         | Retention Time | Peak Area | Area % |
|---------------|------------------------------|----------------|-----------|--------|
| 1             | ( <i>R</i> )-1-phenylethanol | 26.301         | 1525.24   | 99.3   |
| 2             | ( <i>S</i> )-1-phenylethanol | 28.283         | 10.854    | 0.7    |
| The Toal      |                              |                | 1536.094  |        |

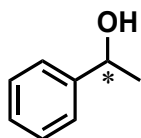

Chiral HPLC analysis: IG column; A: n-hexane/ isopropanol = 98/2 (v/v),  
B: ethanol = 100 (v); flow rate = 0.3 mL min<sup>-1</sup>; 254 nm; 25 °C;  $t_R$  = 54.04 min,  $t_S$  =  
57.41 min.

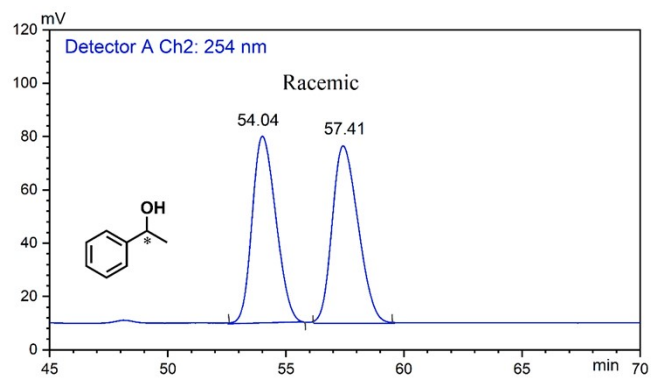

| Serial Number | Type                         | Retention Time | Peak Area  | Area % |
|---------------|------------------------------|----------------|------------|--------|
| 1             | ( <i>R</i> )-1-phenylethanol | 54.04          | 588093.34  | 48.6   |
| 2             | ( <i>S</i> )-1-phenylethanol | 57.41          | 621639.31  | 51.4   |
| The Toal      |                              |                | 1209732.65 |        |

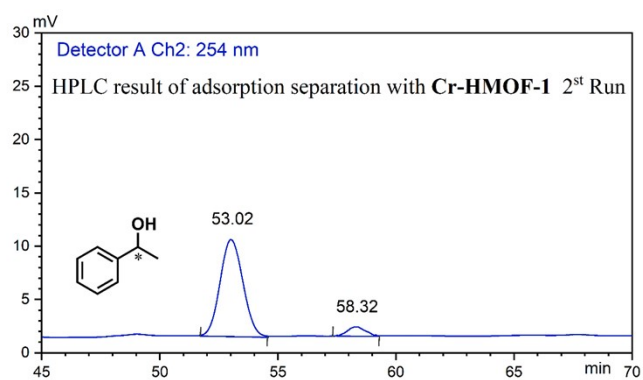

| Serial Number | Type                         | Retention Time | Peak Area | Area % |
|---------------|------------------------------|----------------|-----------|--------|
| 1             | ( <i>R</i> )-1-phenylethanol | 53.02          | 4012.85   | 92.9   |
| 2             | ( <i>S</i> )-1-phenylethanol | 58.32          | 305.30    | 7.1    |
| The Toal      |                              |                | 4318.35   |        |

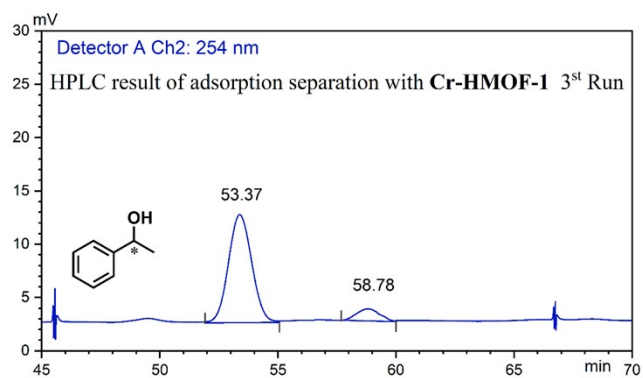



| Serial Number | Type                         | Retention Time | Peak Area | Area % |
|---------------|------------------------------|----------------|-----------|--------|
| 1             | ( <i>R</i> )-1-phenylethanol | 53.37          | 3376.14   | 90.4   |
| 2             | ( <i>S</i> )-1-phenylethanol | 58.78          | 357.70    | 9.6    |
| The Toal      |                              |                | 3733.84   |        |

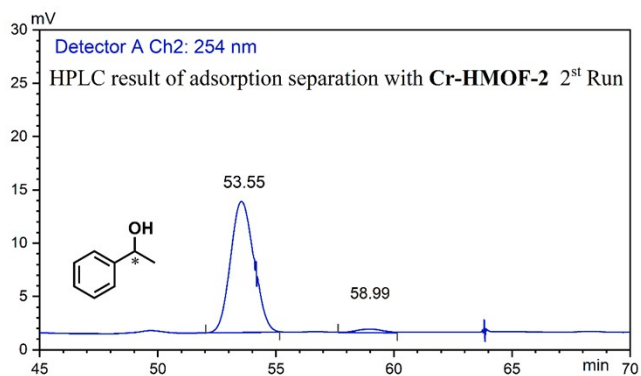

| Serial Number | Type                         | Retention Time | Peak Area | Area % |
|---------------|------------------------------|----------------|-----------|--------|
| 1             | ( <i>R</i> )-1-phenylethanol | 53.55          | 3520.02   | 97.6   |
| 2             | ( <i>S</i> )-1-phenylethanol | 58.99          | 87.57     | 2.4    |
| The Toal      |                              |                | 3607.59   |        |

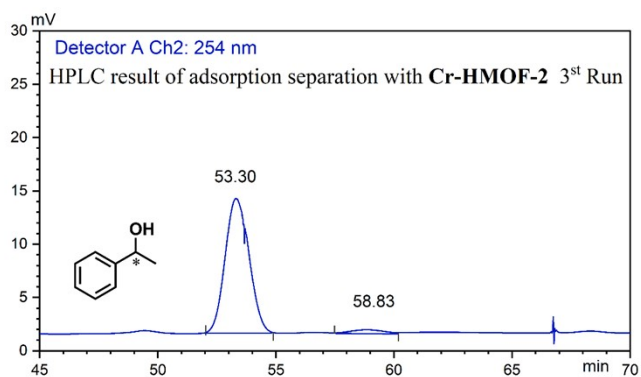

| Serial Number | Type                         | Retention Time | Peak Area | Area % |
|---------------|------------------------------|----------------|-----------|--------|
| 1             | ( <i>R</i> )-1-phenylethanol | 35.30          | 4421.76   | 97.3   |
| 2             | ( <i>S</i> )-1-phenylethanol | 58.83          | 120.39    | 2.7    |
| The Toal      |                              |                | 4542.15   |        |

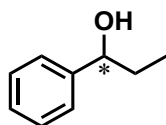

Chiral HPLC analysis: IG column; n-hexane/ethanol = 95/5 (v/v); flow

rate = 0.3 mL min<sup>-1</sup>; 254 nm; 35 °C;  $t_R$  = 25.083 min,  $t_R$  = 26.300 min.

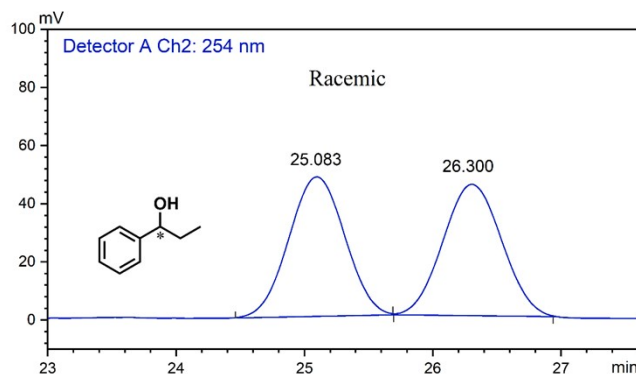

| Serial Number | Type                | Retention Time | Peak Area | Area % |
|---------------|---------------------|----------------|-----------|--------|
| 1             | 1-phenyl-1-propanol | 25.083         | 62891.76  | 49.8   |
| 2             | 1-phenyl-1-propanol | 26.300         | 63337.97  | 50.2   |
| The Toal      |                     |                | 126229.73 |        |

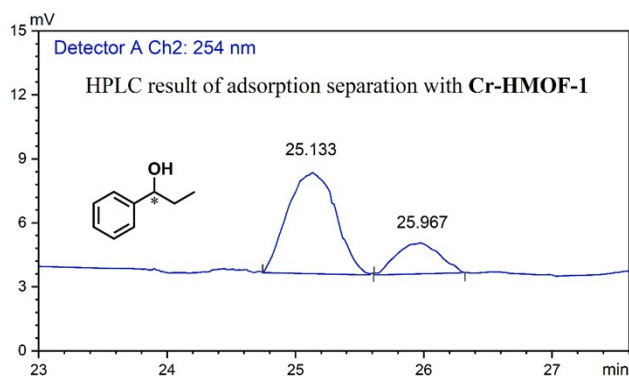

| Serial Number | Type                | Retention Time | Peak Area | Area % |
|---------------|---------------------|----------------|-----------|--------|
| 1             | 1-phenyl-1-propanol | 25.133         | 297.98    | 79.0   |
| 2             | 1-phenyl-1-propanol | 25.967         | 78.99     | 21.0   |
| The Toal      |                     |                | 376.97    |        |

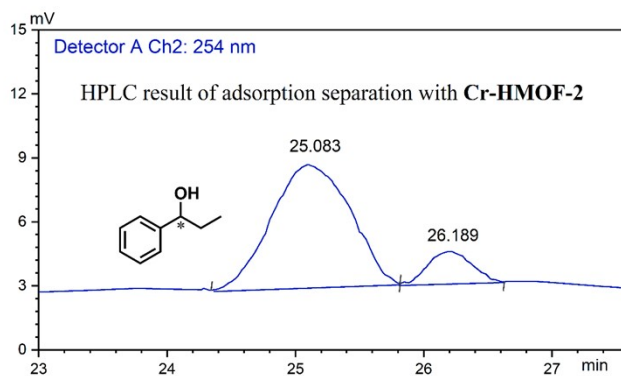

| Serial Number | Type                | Retention Time | Peak Area | Area % |
|---------------|---------------------|----------------|-----------|--------|
| 1             | 1-phenyl-1-propanol | 25.083         | 728.141   | 89.0   |
| 2             | 1-phenyl-1-propanol | 26.189         | 90.025    | 11.0   |
| The Toal      |                     |                | 818.166   |        |

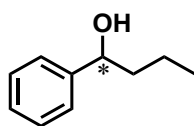

Chiral HPLC analysis: OJ-H column; n-hexane/isopropanol/trifluoroacetic acid = 95/5/0.1 (v/v/v); flow rate = 0.3 mL min<sup>-1</sup>; 254 nm; 25 °C;  $t_R = 24.763$  min,  $t_R = 26.540$  min.

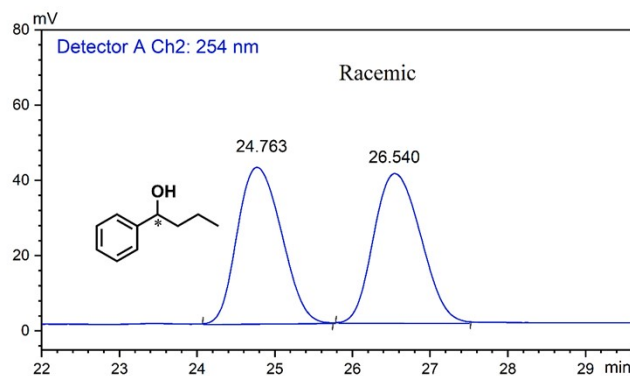

| Serial Number | Type               | Retention Time | Peak Area | Area % |
|---------------|--------------------|----------------|-----------|--------|
| 1             | 1-phenylbutan-1-ol | 24.763         | 1540255   | 49.9   |
| 2             | 1-phenylbutan-1-ol | 26.540         | 1543884   | 50.1   |
| The Toal      |                    |                | 3084139   |        |

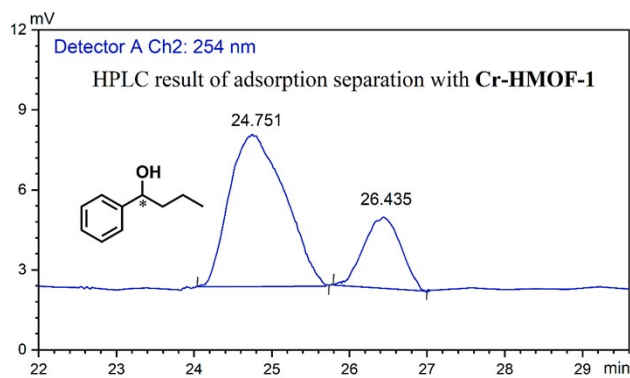

| Serial Number | Type               | Retention Time | Peak Area | Area % |
|---------------|--------------------|----------------|-----------|--------|
| 1             | 1-phenylbutan-1-ol | 24.751         | 4664.579  | 78.4   |
| 2             | 1-phenylbutan-1-ol | 26.435         | 1281.566  | 21.6   |
| The Toal      |                    |                | 5946.145  |        |

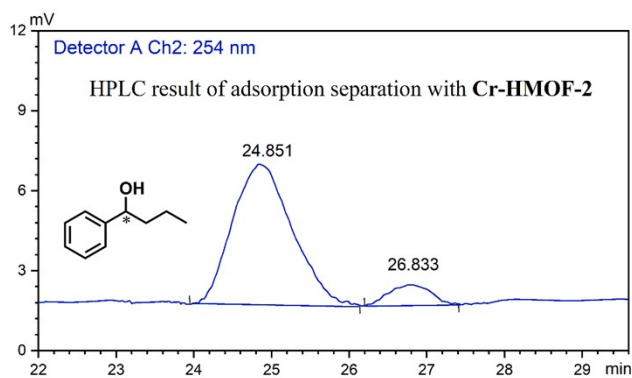

| Serial Number | Type               | Retention Time | Peak Area | Area % |
|---------------|--------------------|----------------|-----------|--------|
| 1             | 1-phenylbutan-1-ol | 24.851         | 5611.259  | 92.5   |
| 2             | 1-phenylbutan-1-ol | 26.833         | 455.492   | 7.5    |
| The Toal      |                    |                | 6066.751  |        |

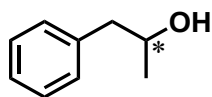

Chiral HPLC analysis: IG column; n-hexane/ethanol = 95/5 (v/v); flow rate = 0.3 mL min<sup>-1</sup>; 254 nm; 35 °C;  $t_R = 26.583$  min,  $t_R = 29.316$  min.

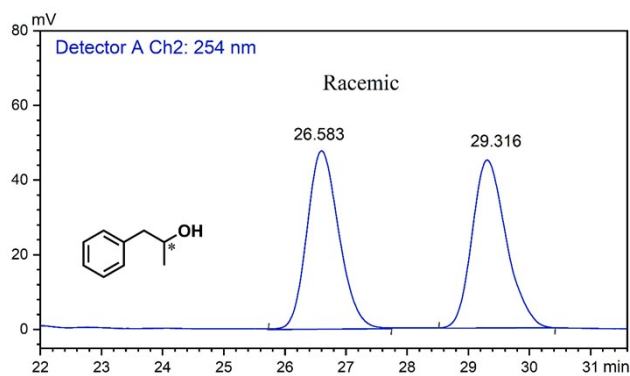

| Serial Number | Type                | Retention Time | Peak Area  | Area % |
|---------------|---------------------|----------------|------------|--------|
| 1             | 1-phenyl-2-propanol | 26.583         | 150802.333 | 49.2   |
| 2             | 1-phenyl-2-propanol | 29.316         | 156006.534 | 50.8   |
| The Toal      |                     |                | 306808.867 |        |

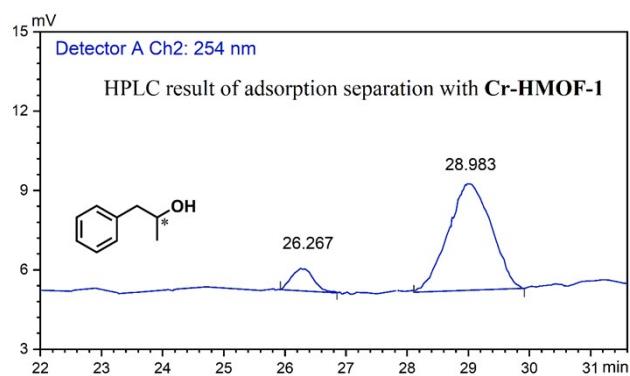

| Serial Number | Type                | Retention Time | Peak Area | Area % |
|---------------|---------------------|----------------|-----------|--------|
| 1             | 1-phenyl-2-propanol | 26.267         | 120.920   | 8.6    |
| 2             | 1-phenyl-2-propanol | 28.983         | 1284.886  | 91.4   |
| The Toal      |                     |                | 1405.806  |        |

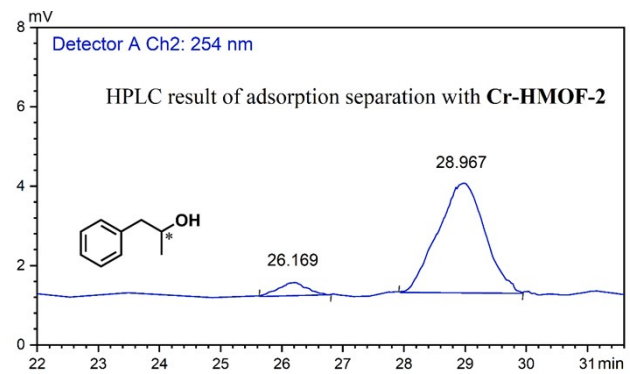

| Serial Number | Type | Retention Time | Peak Area | Area % |
|---------------|------|----------------|-----------|--------|
|---------------|------|----------------|-----------|--------|

|          |                     |        |          |      |
|----------|---------------------|--------|----------|------|
| 1        | 1-phenyl-2-propanol | 26.169 | 114.283  | 5.4  |
| 2        | 1-phenyl-2-propanol | 28.967 | 2006.233 | 94.6 |
| The Toal |                     |        | 2120.516 |      |
